# Supplementary material for: An LGR4 agonist activates the GSK-3β pathway to inhibit RANK-RANKL signaling during osteoclastogenesis in bone marrow-derived macrophages
Source: PubMed Central journal article supplement — Int J Mol Med. 2023 Dec 5;53(1):10. doi: 10.3892/ijmm.2023.5334 (PMC10712694; doi:10.3892/ijmm.2023.5334), 2023-12-05

Figure S1. Purified receptors were characterized by western blotting of the His-tag band. His, histidine; LGR4, leucine-rich repeat-containing G-protein-coupled receptor 4; M, marker; RANK, receptor-activated nuclear factor- $\kappa$ B.

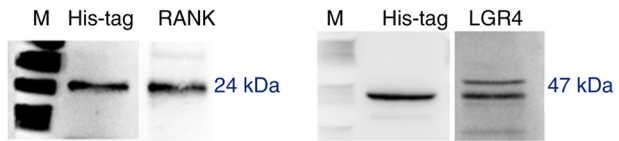

Figure S2. Cell viability was determined using the MTT assay. Bone marrow-derived macrophages were exposed to various concentrations of MK2206. The results are presented as the mean  $\pm$  standard deviation of three independent experiments.

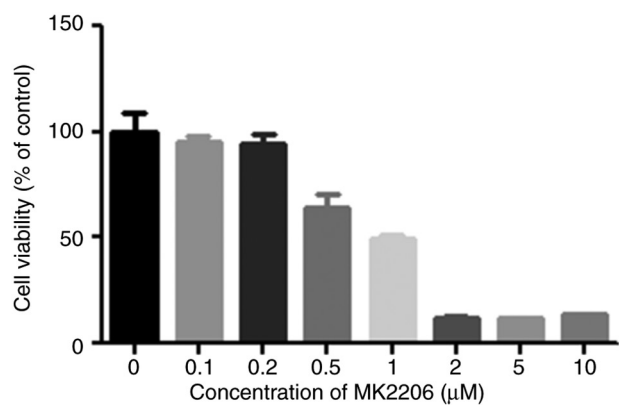

Figure S3. Cell viability was determined using the MTT assay. Bone marrow-derived macrophages were exposed to various concentrations of LiCl. The results are presented as the mean  $\pm$  standard deviation of three independent experiments. LiCl, lithium chloride.

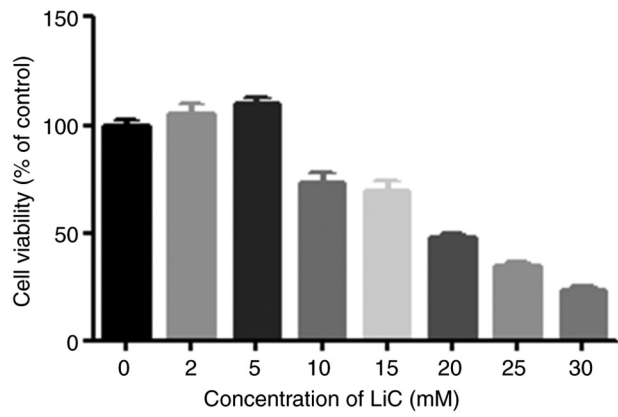

Supplement: Supplementary_Data.pdf [file Supplementary_Data.pdf]
